# Supplementary material for: Life Stage-Specific Cargo Receptors Facilitate Glycosylphosphatidylinositol-Anchored Surface Coat Protein Transport in Trypanosoma brucei
Source: PubMed Central journal article supplement (PMC5506558; doi:10.1128/msphere.00282-17), 2017-07-12
Supplement: sph004172321sf2.pdf [file sph004172321sf2.pdf]

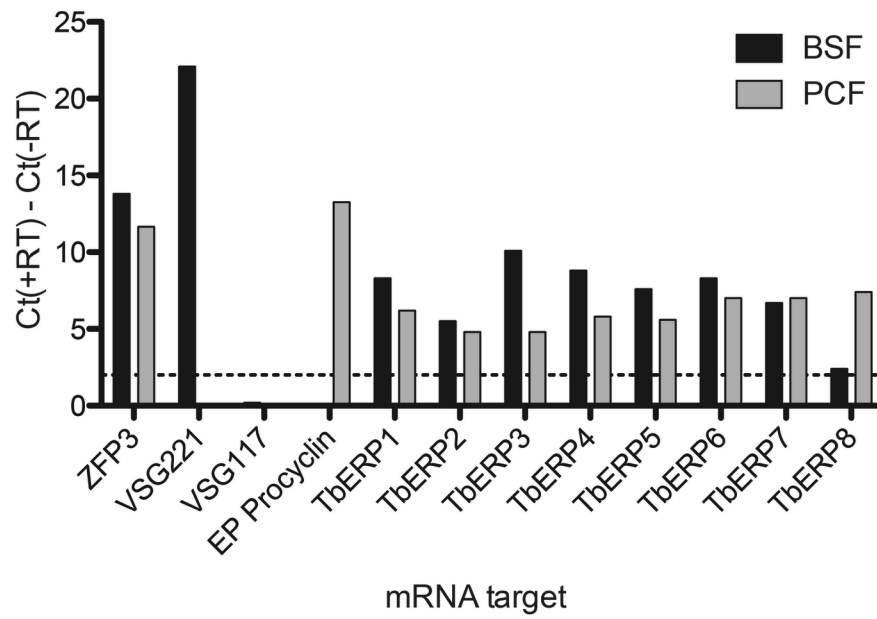

**Fig. S2**
