# Supplementary material for: Life Stage-Specific Cargo Receptors Facilitate Glycosylphosphatidylinositol-Anchored Surface Coat Protein Transport in Trypanosoma brucei
Source: PubMed Central journal article supplement (PMC5506558; doi:10.1128/msphere.00282-17), 2017-07-12
Supplement: sph004172321st3.pdf [file sph004172321st3.pdf]

**Table S1: *Trypanosoma brucei* p24 orthologues**

| <b>Name</b> | <b>TriTryp Accession</b> | <b>CDS length<br/>(nt)</b> | <b>RNAi target<br/>(nt)</b> | <b>C term peptide</b>    |
|-------------|--------------------------|----------------------------|-----------------------------|--------------------------|
| TbERP1      | Tb927.11.15230           | 687                        | 31-471                      | RRIFN <i>KRRVV</i>       |
| TbERP2      | Tb927.9.15090            | 660                        | 63-556                      | EMWHLKRYFRKKRL <i>ID</i> |
| TbERP3      | Tb927.8.8030             | 618                        | 8-500                       | KRFLE <i>RKSFV</i>       |
| TbERP4      | Tb927.4.4350             | 612                        | 1-612                       | KCFLE <i>RKSFV</i>       |
| TbERP5      | Tb927.10.9270            | 699                        | 53-523                      | SEKYLERFFIKQKIA          |
| TbERP6      | Tb927.7.3600             | 678                        | 205-269                     | KRMFN <i>RKGTRAVA</i>    |
| TbERP7      | Tb927.8.7280             | 744                        | 126-662                     | RTLRFLL <i>RCKPQ</i>     |
| TbERP8      | Tb927.10.6640            | 762                        | 55-613                      | RLKSTLREK <i>KLV</i>     |

Putative targeting signals: COPI, KXKXX (italicized); COPII, di-hydrophobic (underlined)
